# Supplementary material
Source: publisher site journal article supplement (https://www.dovepress.com/article/586916)
Supplement: Supplementary file 1 [file 586916%20Supplementary%20Materials.docx]

**Supplementary Figure S1. Single-cell expression, subcellular localization, and genomic conservation of ACTA2.**

(A) Single-cell type specificity analysis from the HPA database showing that ACTA2 expression is group-enriched in peritubular cells, smooth muscle cells, Sertoli cells, and breast myoepithelial cells.

(B) Immunofluorescence images from HPA demonstrate that ACTA2 protein is mainly localized to cytoplasmic actin filaments, co-staining with microtubules and the endoplasmic reticulum (ER) across U-251 MG, A-431, and U2OS cell lines, indicating a consistent filamentous distribution.

(C) Representative IHC staining images of normal human liver tissues obtained from the Human Protein Atlas (HPA) database. Each IHC section is accompanied by sample information, including HPA sample ID, age, sex, and tissue type. Black dashed boxes indicate the regions selected for higher-magnification visualization, and the enlarged panels on the right display detailed staining patterns.

(D) Corresponding hematoxylin and eosin (H&E)–stained liver sections used for RNA-seq annotation in the HPA dataset. Black solid boxes indicate the approximate regions used for RNA-seq–based cell-type annotation, while the magnified views illustrate representative histological structures within the selected areas. The estimated proportions of major cell types are shown below each section to facilitate interpretation of gene expression localization.

(E) Chromosomal localization of the target gene on human chromosome 10. The cytogenetic banding pattern illustrates the genomic organization of chromosome 10, with the red vertical line indicating the precise genomic position of the target gene at 10q23.31.

(F) Cross-species conservation analysis from the UCSC Genome Browser indicates that ACTA2 is highly conserved among vertebrates, particularly within exons encoding actin structural domains, suggesting strong evolutionary constraint on its functional regions.





**Supplementary Figure S2. Genetic mutation analysis of ACTA2.**

(A) Overview of genomic profiling information across liver cancer samples, including study origin, number of samples per patient, and availability of mutation, copy number alteration (CNA), and structural variant data. The asterisk (*) next to the gene name indicates the overall alteration frequency of ACTA2, which is less than 1% across the analyzed liver cancer cohort.

(B) Distribution and frequency of different genomic alteration types of ACTA2 in liver cancer. Alteration categories include mutation, structural variant, amplification, and deep deletion. Plus (+) indicates the presence of the corresponding genomic data type, whereas minus (−) indicates that the data type is not available for the corresponding dataset. Overall, ACTA2 alterations occur in <2% of liver cancer samples, with structural variants representing the predominant alteration type, followed by amplification and deep deletion.

(C) TISIDB analysis indicates that ACTA2 copy number loss shows no significant association with immune checkpoint inhibitors, immunostimulators, or MHC molecule expression.

(D) Distribution of ACTA2 mutation counts across liver cancer datasets.

(E–F) TIMER3.0 results showing that in liver hepatocellular carcinoma (LIHC), ACTA2 mainly exists in a diploid/normal state with low mutation frequency, suggesting genomic stability. The red rectangular box highlights the LIHC cohort (liver hepatocellular carcinoma) analyzed in this study.

Data for genomic alterations and immune-related gene categories were obtained from publicly available databases, including cBioPortal, TIMER3.0, and TISIDB.
